# Supplementary material
Source: PubMed Central journal article supplement (PMC5971596)
Supplement: AAC.00195-18_zac006187202s1.pdf [file AAC.00195-18_zac006187202s1.pdf]

**Table S1. Antifungal therapy details of 71 patients and MIC ranges of *C. glabrata* isolates recovered.**

| <b>Treatment and date of sampling</b> | <b>Patients</b> | <b>MIC range (<math>\mu\text{g/ml}</math>)</b> |
|---------------------------------------|-----------------|------------------------------------------------|
| Fluconazole                           |                 |                                                |
| >7 days                               | 3               | 0.25-16                                        |
| <7days                                | 39              | 0.25-8                                         |
| Voriconazole                          |                 |                                                |
| >7 days                               | 1               | 0.5                                            |
| <7 days                               | 18              | 0.032-0.064                                    |
| Caspofungin                           |                 |                                                |
| >7days                                | None            |                                                |
| <7days                                | 10              | 0.25-2                                         |
